# Supplementary material
Source: ML conference proceedings conference paper supplement (https://proceedings.neurips.cc/paper_files/paper/2019/hash/8a0e1141fd37fa5b98d5bb769ba1a7cc-Abstract.html)
Supplement: Supplementary file [file 8a0e1141fd37fa5b98d5bb769ba1a7cc-Supplemental.zip]

402 **A**

### 403 **A.1 Topology of the Graph**

404 Here, we explain the matrix in the Algorithm 1 which are closely related to the topology of the Graph,  
405 which is left from the main paper due to the limit of the space.

- 406 •  $D = \text{diag}[d_1, \dots, d_N]$  is the degree matrix, with  $d_i$  denoting the degree of node  $i$ .
- 407 •  $A$  is the node-edge incidence matrix: if  $e \in \mathcal{E}$  and it connects vertex  $i$  and  $j$  with  $i > j$ , then  
408  $A_{ev} = 1$  if  $v = i$ ,  $A_{ev} = -1$  if  $v = j$  and  $A_{ev} = 0$  otherwise.
- 409 • The signless incidence matrix  $B := |A|$ , where the absolute value is taken for each compo-  
410 nent of  $A$ .
- 411 • The signless graph Laplacian  $L^+ = B^T B$ . By definition  $L^+(i, j) = 0$  if  $(i, j) \notin \mathcal{E}$ . Notice  
412 the non-zeros element in  $A, L^+$ , the update just depends on each agent itself and its neighbor.

### 413 **A.2 Practical Acceleration**

414 The algorithm 1 trains the agent with vanilla gradient decent method with a extra consensus update. In  
415 practice, the adaptive momentum gradient methods including Adagrad Duchi et al. [2011], Rmsprop  
416 Tieleman and Hinton and Adam Kingma and Ba [2014] have much better performance in training  
417 the deep neural network. We adapt Adam in our setting, and propose algorithm 2 which has better  
418 performance than algorithm 1 in practice.

---

#### **Algorithm 2** Accelerated value propagation

---

Input: Environment ENV, learning rate  $\beta_1, \beta_2 \in [0, 1)$ ,  $\alpha_t$ , discount factor  $\gamma$ , a mixing matrix  $W$ ,  
number of step  $T_{dual}$  to train dual parameter  $\theta_{\rho^i}$ , replay buffer capacity  $B$ .

Initialization of  $\theta_{v^i}, \theta_{\pi^i}, \theta_{\rho^i}$ , moment vectors  $m_{v^i}^0 = m_{\rho^i}^0 = 0, w_{v^i}^0 = w_{\rho^i}^0 = 0$ .

**for**  $t = 1, \dots, T$  **do**

sample trajectory  $s_{0:T} \sim \pi(s, a) = \prod_{i=1}^N \pi^i(s, a^i)$  and add it into the replay buffer.

**// Update the dual parameter  $\theta_{\rho^i}$**

Do following update  $T_{dual}$  times:

Random sample a mini-batch of transition  $(s_t, \{a_t^i\}_{i=1}^N, s_{t+1}, \{r_t^i\}_{i=1}^N)$  from the replay buffer.

**for** agent  $i = 1$  to  $n$  **do**

Calculate the stochastic gradient  $g(\theta_{\rho^i}^t)$  of  $-\eta(\delta_i(s_t, a_t, s_{t+1}) - \rho_i(s_t, a_t))^2$  w.r.t.  $\theta_{\rho^i}^t$ .

**// update momentum parameters:**  $m_{\rho^i}^t = \beta_1 m_{\rho^i}^{t-1} + (1 - \beta_1)(-g(\theta_{\rho^i}^t))$

$w_{\rho^i}^t = \beta_2 w_{\rho^i}^{t-1} + (1 - \beta_2)g(\theta_{\rho^i}^t) \odot g(\theta_{\rho^i}^t)$

**end for**

**// Do consensus update for each agent  $i$**

$\theta_{\rho^i}^{t+\frac{1}{2}} = \sum_{j=1}^N [W]_{ij} \theta_{\rho^j}^t, \theta_{\rho^i}^t = \theta_{\rho^i}^{t+\frac{1}{2}} - \alpha_t \frac{m_{\rho^i}^t}{\sqrt{w_{\rho^i}^t}}$

**// End the update of dual problem**

**// Update primal parameters  $\theta_{v^i}, \theta_{\pi^i}$ .**

Random sample a mini-batch of transition  $(s_t, \{a_t^i\}_{i=1}^N, s_{t+1}, \{r_t^i\}_{i=1}^N)$  from the replay buffer.

**for** agent  $i = 1$  to  $n$  **do**

Calculate the stochastic gradient  $g(\theta_{v^i}^t), g(\theta_{\pi^i}^t)$  of  $(\delta_i(s_t, a_t, s_{t+1}) - V_i(s_t))^2 - \eta(\delta_i(s_t, a_t, s_{t+1}) - \rho_i(s_t, a_t))^2$ , w.r.t.  $\theta_{v^i}^t, \theta_{\pi^i}^t$

**//update the momentum parameter:**

$m_{v^i}^t = \beta_1 m_{v^i}^{t-1} + (1 - \beta_1)g(\theta_{v^i}^t)$

$w_{v^i}^t = \beta_2 w_{v^i}^{t-1} + (1 - \beta_2)g(\theta_{v^i}^t) \odot g(\theta_{v^i}^t)$

**// Using Adam to update  $\theta_{\pi^i}$  for each agent  $i$ .**

**// Do consensus update on  $\theta_{v^i}$  for each agent  $i$ :**

$\theta_{v^i}^{t+\frac{1}{2}} = \sum_{j=1}^N [W]_{ij} \theta_{v^j}^t, \theta_{v^i}^t = \theta_{v^i}^{t+\frac{1}{2}} - \alpha_t \frac{m_{v^i}^t}{\sqrt{w_{v^i}^t}}$

**end for**

**end for**

---

419 **Mixing Matrix:** In Algorithm 2, there is a mixing matrix  $W \in \mathbb{R}^{N \times N}$  in the consensus update. As  
 420 its name suggests, it mixes information of the agent and its neighbors. This nonnegative matrix  $W$   
 421 need to satisfy the following condition.

- 422 •  $W$  needs to be doubly stochastic, i.e.,  $W^T \mathbf{1} = \mathbf{1}$  and  $W \mathbf{1} = \mathbf{1}$ .
- 423 •  $W$  respects the communication graph  $\mathcal{G}$ , i.e.,  $W(i, j) = 0$  if  $(i, j) \notin \mathcal{E}$ .
- 424 • The spectral norm of  $W^T(I - \mathbf{1}\mathbf{1}^T/N)W$  is strictly smaller than one.

425 Here is one particular choice of the mixing matrix  $W$  used in our work which satisfies above  
 426 requirement called Metropolis weights Xiao et al. [2005].

$$\begin{aligned} W(i, j) &= 1 + \max[d(i), d(j)]^{-1}, \forall (i, j) \in \mathcal{E}, \\ W(i, i) &= 1 - \sum_{j \in NE(i)} W(i, j), \forall i \in \mathcal{N}, \end{aligned} \quad (10)$$

427 where  $NE(i) = \{j \in \mathcal{N} : (i, j) \in \mathcal{E}\}$  is the set of neighbors of the agent  $i$  and  $d(i) = |\mathcal{N}(i)|$  is the  
 428 degree of agent  $i$ . Such mixing matrix is widely used in decentralized and distributed optimization  
 429 Boyd et al. [2006], Cattivelli et al. [2008]. The update rule of the momentum term in Algorithm  
 430 2 is adapted from Adam. The consensus (communication) steps are  $\theta_{\rho^i}^{t+\frac{1}{2}} = \sum_{j=1}^N [W]_{ij} \theta_{\rho^j}^t$  and  
 431  $\theta_{v^i}^{t+\frac{1}{2}} = \sum_{j=1}^N [W]_{ij} \theta_{v^j}^t$ .

### 432 A.3 Multi-step Extension on value propagation

433 The temporal consistency can be extended to the multi-step case Nachum et al. [2017], where the  
 434 following equation holds

$$V(s_0) = \sum_{t=0}^{k-1} \gamma^t \mathbb{E}_{s_t | s_0, a_{0:t-1}} [R(s_t, a_t) - \lambda \log \pi(s_t, a_t^i)] + \gamma^k \mathbb{E}_{s_k | s_0, a_{0:k-1}} V(s_k).$$

435 Thus in the objective function (8), we can replace  $\delta_i$  by  $\delta_i(s_{0:k}, a_{0:k-1}) = \sum_{t=0}^{k-1} \gamma^t (R_i(s_t, a_t) -$   
 436  $\lambda N \log \pi^i(s_t, a_t^i)) + \gamma^k V_i(s_k)$  and change the estimation of stochastic gradient correspondingly in  
 437 Algorithm 1 and Algorithm 2 to get the multi-step version of value propagation. In practice, the  
 438 performance of setting  $k > 1$  is better than  $k = 1$  which is also observed in single agent case Nachum  
 439 et al. [2017], Dai et al. [2018]. We can tune  $k$  for each application to get the best performance.

### 440 A.4 Implementation details of the experiments

#### 441 Ablation Study

442 The value function  $v_i(s)$  and dual variable  $\rho_i(s, a)$  are approximated by two hidden-layer neural  
 443 network with Relu as the activation function where each hidden-layer has 20 hidden units. The policy  
 444 of each agent is approximated by a one hidden-layer neural network with Relu as the activation  
 445 function where the number of the hidden units is 32. The output is the softmax function to approximate  
 446  $\pi^i(s, a^i)$ . The mixing matrix in Algorithm 2 is selected as the Metropolis Weights in (10). The graph  
 447  $\mathcal{G}$  is generated by randomly placing communication links among agents such that the connectivity  
 448 ratio is  $4/N$ . We set  $\gamma = 0.9$ ,  $\lambda = 0.01$ , learning rate  $\alpha = 5e-4$ . The choice of  $\beta_1, \beta_2$  are the default  
 449 value in Adam.

#### 450 Cooperative Navigation task

451 The value function  $v_i(s)$  is approximated by a two-hidden-layer neural network with Relu as the  
 452 activation function where inputs are the state information. Each hidden-layer has 40 hidden units.  
 453 The dual function  $\rho(s, a)$  is also approximated by a two-hidden-layer neural network, where the only  
 454 difference is that inputs are state-action pairs (s,a). The policy is approximated by a one-hidden-layer  
 455 neural network with Relu as the activation function. The number of the hidden units is 32. The  
 456 output is the softmax function to approximate  $\pi^i(s, a^i)$ . In all experiments, we use the multi-step  
 457 version of value propagation and choose  $k = 4$ . We choose  $\gamma = 0.95$ ,  $\lambda = 0.01$ . The learning  
 458 rate of Adam is chosen as  $5e-4$  and  $\beta_1, \beta_2$  are default value in Adam optimizer. The setting of PCL

without communication is exactly same with value propagation except the absence of communication network.

## A.5 Consensus update in Algorithm 1

We now give details to derive the Consensus Update in Algorithm 1 with  $\eta = 1$  to ease the exposition. When  $\eta \in [0, 1)$ , we just need to change variable and some notations, the result are almost same. Here we use the primal update as an example, the derivation of the dual update is the same. In the main paper section 3, we have shown that when  $\eta = 1$ , in the primal update, we basically solve following problem.

$$\begin{aligned} \min_{\{\theta_{v_i}, \theta_{\pi^i}\}_{i=1}^N} & 2\mathbb{E}_{s,a,s}[\nu^*(s, a) \left( \frac{1}{N} \sum_{i=1}^N (R^i(s, a) + \gamma V_i(s') - V_i(s) - \lambda N \log \pi^i(s, a)) \right) - \mathbb{E}_{s,a,s}[\nu^{*2}(s, a)], \\ \text{s.t.}, & \theta_{v_1} = \dots = \theta_{v_n}. \end{aligned} \quad (11)$$

here for simplicity we assume in the dual optimization, we have already find the optimal solution  $\nu^*(s, a)$ . It can be any approximated solution of  $\tilde{\nu}(s, a)$  which does not affect the derivation of the update rule in primal optimization. In the later proof, we will show how this approximated solution affects the convergence rate.

When we optimize w.r.t.  $\theta_{v^i}$ , we basically we solve a non-convex problem with the following form

$$\min_x f(x) = \sum_{i=1}^N f_i(x_i), \quad \text{s.t. } x_1 = \dots = x_N \quad (12)$$

Recall the definition of the node-edge incidence matrix  $A$ : if  $e \in \mathcal{E}$  and it connects vertex  $i$  and  $j$  with  $i > j$ , then  $A_{ev} = 1$  if  $v = i$ ,  $A_{ev} = -1$  if  $v = j$  and  $A_e v = 0$  otherwise. Thus by define  $x = [x_1, \dots, x_N]'$  we have a equivalent form of (12)

$$\min_x f(x) = \sum_{i=1}^N f_i(x_i), \quad \text{s.t.}, \quad Ax = 0 \quad (13)$$

Notice the update of  $\theta_{\pi^i}$  is a special case of above formulation, since we do not have the constraint  $x_1 = \dots = x_N$ . Thus in the following, it suffice to analyze above formulation (13). We adapt the Prox-PDA in Hong et al. [2017] to solve above problem. To keep the notation consistent with Hong et al. [2017], we consider a more general problem

$$\min_x f(x) = \sum_{i=1}^N f_i(x_i), \quad \text{s.t.}, \quad Ax = b.$$

In the following we denote  $\nabla f(x^t) := [(\nabla_{x_1} f(x_1))^T, \dots, (\nabla_{x_N} f(x_N))^T]^T$  where the superscript  $'$  means transpose. We denote  $g_i(x_i)$  as an estimator of  $\nabla_{x_i} f(x_i)$  and  $g(x) = [g_1(x_1), \dots, g_N(x_N)]$ .

The update rule of Prox-PDA is

$$x^{t+1} = \arg \min_x \langle g(x^t), x - x^t \rangle + \langle \mu^t, Ax - b \rangle + \frac{\beta}{2} \|Ax - b\|^2 + \frac{\beta}{2} \|x - x^t\|_{B^T B}^2 \quad (14)$$

$$\mu^{t+1} = \mu^t + \beta(Ax^{t+1} - b) \quad (15)$$

where  $g(x^t)$  is an estimator of  $\nabla f(x^t)$ . The signed graph Laplacian matrix  $L_-$  is  $A^T A$ . Now we choose  $B := |A|$  as the signless incidence matrix. Using this choice of  $B$ , we have  $B^T B = L^+ \in \mathbb{R}^{N \times N}$  which is the signless graph Laplacian whose  $(i, i)$ th diagonal entry is the degree of node  $i$  and its  $(i, j)$ th entry is 1 if  $e = (i, j) \in \mathcal{E}$ , and 0 otherwise.

486 Thus

$$\begin{aligned}
x^{t+1} &= \arg \min_x \langle g(x^t), x - x^t \rangle + \langle \mu^t, Ax - b \rangle + \frac{\beta}{2} x^T L_- x + \frac{\beta}{2} (x - x^t)^T L^+ (x - x^t) \\
&= \arg \min_x \langle g(x^t), x \rangle + \langle \mu^t, Ax - b \rangle + \frac{\beta}{2} x^T (L_- + L^+) x - \beta x^T L^+ x^t \\
&= \arg \min_x \langle g(x^t), x \rangle + \langle \mu^t, Ax - b \rangle + \beta x^T D x - \beta x^T L^+ x^t,
\end{aligned} \tag{16}$$

487 where  $D = \text{diag}[d_1, \dots, d_N]$  is the degree matrix, with  $d_i$  denoting the degree of node  $i$ .

488 After simple algebra, we obtain

$$x^{t+1} = \frac{1}{2} D^{-1} L^+ x^t - \frac{1}{2\beta} D^{-1} A^T \mu^t - \frac{1}{2\beta} D^{-1} g(x^t),$$

489 which is the primal update rule of the consensus step in the algorithm 1 (notice here the stepsize is  
490  $1/\beta$ )

## 491 B Convergence Proof of Value Propagation

### 492 B.1 Convergence on the primal update

493 In this section, we first give the convergence analysis of the value propagation (algorithm 1) on the  
494 primal update. To include the effected of the inexact solution of dual optimization problem, we  
495 denote  $g(x^t) = \nabla f(x^t) + \epsilon_t$ , where  $\epsilon_t = \varepsilon_t + \tilde{\varepsilon}_t$  is some error terms.

- 496 •  $\varepsilon_t$  is a zero mean random variable coming from the randomness of the stochastic gradient  
497  $g(x^t)$ .
- 498 •  $\tilde{\varepsilon}_t$  comes from the approximated solution of  $\tilde{\nu}$  in (11) or  $\tilde{\rho}$  in (8) such  
499 that  $\|\nabla_{\theta_v} L(\theta_V, \theta_\pi, \tilde{\theta}_\rho) - \nabla_{\theta_v} L(\theta_V, \theta_\pi, \theta_\rho^*)\| \leq \tilde{\varepsilon}_t$  and  $\|\nabla_{\theta_\pi} L(\theta_V, \theta_\pi, \tilde{\theta}_\rho) -$   
500  $\nabla_{\theta_\pi} L(\theta_V, \theta_\pi, \theta_\rho^*)\| \leq \tilde{\varepsilon}_t$ .

501 Before we begin the proof, we made some mild assumption on the function  $f(x)$ .

**Assumption 2.** 1. The function  $f(x)$  is differentiable and has Lipschitz continuous gradient, i.e.,

$$\|\nabla f(x) - \nabla f(y)\| \leq \|x - y\|, \forall x, y \in \mathbb{R}^K.$$

502 2. Further assume that  $A^T A + B^T B \succcurlyeq I$ . This assumption is always satisfied by our choice on A  
503 and B. We have  $A^T A + B^T B \succcurlyeq D \succcurlyeq \min_i \{d_i\} I$

504 3. There exists a constant  $\delta > 0$  such that  $\exists f > -\infty, s.t., f(x) + \frac{\delta}{2} \|Ax - b\|^2 \geq \underline{f}, \forall x$ . This  
505 assumption is satisfied if we require the parameter space is bounded.

506 **Lemma 1.** Suppose the assumption 2 is satisfied, we have following inequality holds

$$\frac{\|\mu^{t+1} - \mu^t\|^2}{\beta} \leq \frac{3L^2}{\beta\sigma_{\min}} \|x^t - x^{t-1}\|^2 + \frac{3}{\beta} \|\epsilon_{t-1} - \epsilon_t\|^2 + \frac{3\beta}{\sigma_{\min}} \|B^T B((x^{t+1} - x^t) - (x^t - x^{t-1}))\|^2 \tag{17}$$

507 *Proof.* Using the optimality condition of (14), we obtain

$$\nabla f(x^t) + \epsilon^t + A^T \mu^t + \beta A^T (Ax^{t+1} - b) + \beta B^T B(x^{t+1} - x^t) = 0 \tag{18}$$

508 applying equation (15) we have

$$A^T \mu^{t+1} = -\nabla f(x^t) - \beta B^T B(x^{t+1} - x^t). \tag{19}$$

509 Note that from the fact that  $\mu^0 = 0$ , we have the variable lies in the column space of A.

$$\mu^r = \beta \sum_{t=1}^r (Ax^t - b).$$

510 Let  $\sigma_{\min}$  denote the smallest non-zero eigenvalue of  $A^T A$ , we have

$$\begin{aligned}
& \sigma_{\min}^{1/2} \|\mu^{t+1} - \mu^t\| \\
& \leq \|A(\mu^{t+1} - \mu^t)\| \\
& \leq \|-\nabla f(x^t) - \epsilon_t - \beta B^T B(x^{t+1} - x^t) - (-\nabla f(x^{t-1}) - \epsilon_{t-1} - \beta B^T B(x^t - x^{t-1}))\| \\
& = \|\nabla f(x^{t-1}) - \nabla f(x^t) + (\epsilon_{t-1} - \epsilon_t) - \beta B^T B((x^{t+1} - x^t) - (x^t - x^{t-1}))\|.
\end{aligned} \tag{20}$$

511 Thus we have

$$\begin{aligned}
& \frac{\|\mu^{t+1} - \mu^t\|^2}{\beta} \\
& \leq \frac{1}{\beta \sigma_{\min}^{1/2}} \|\nabla f(x^{t-1}) - \nabla f(x^t) + (\epsilon_{t-1} - \epsilon_t) - \beta B^T B((x^{t+1} - x^t) - (x^t - x^{t-1}))\|^2 \\
& \leq \frac{3L^2}{\beta \sigma_{\min}} \|x^t - x^{t-1}\|^2 + \frac{3}{\beta} \|\epsilon_{t-1} - \epsilon_t\|^2 + \frac{3\beta}{\sigma_{\min}} \|B^T B((x^{t+1} - x^t) - (x^t - x^{t-1}))\|^2,
\end{aligned} \tag{21}$$

512 where the second inequality holds from the fact that  $(a + b + c)^2 \leq 3a^2 + 3b^2 + 3c^2$ .

513

□

514 **Lemma 2.** Define  $L_\beta(x^t, \mu^t) = f(x^t) + \langle \mu^t, Ax - b \rangle + \frac{\beta}{2} \|Ax - b\|^2 + \frac{\beta}{2} \|x - x^t\|_{B^T B}$ . Suppose  
515 assumptions are satisfied, then the following is true for the algorithm

$$\begin{aligned}
& L_\beta(x^{t+1}, \mu^{t+1}) - L_\beta(x^t, \mu^t) \\
& \leq -\frac{\beta}{2} \|x^{t+1} - x^t\|^2 + \frac{3L^2}{\beta \sigma_{\min}} \|x^t - x^{t-1}\|^2 + \frac{3}{\beta} \|\epsilon_{t-1} - \epsilon_t\|^2 + \frac{3\beta}{\sigma_{\min}} \|B^T B((x^{t+1} - x^t) - (x^t - x^{t-1}))\|^2 \\
& \quad + \langle \epsilon_t, x^{t+1} - x^t \rangle
\end{aligned} \tag{22}$$

516 *Proof.* By the Assumptions  $A^T A + B^T B \geq I$ , the objective function in (14) is strongly convex with  
517 parameter  $\beta$ .

518 Using the optimality condition of  $x^{t+1}$  and strong convexity, we have for any  $x$ ,

$$\begin{aligned}
& L_\beta(x, \mu^t) + \frac{\beta}{2} \|x - x^t\|_{B^T B}^2 - (L_\beta(x^{t+1}, \mu^t) + \frac{\beta}{2} \|x^{t+1} - x^t\|_{B^T B}^2) \\
& \geq \langle \nabla L_\beta(x^{t+1}, \mu^t) + \beta B^T B(x^{t+1} - x^t), x - x^{t+1} \rangle + \frac{\beta}{2} \|x^{t+1} - x\|^2
\end{aligned} \tag{23}$$

519 Now we start to provide an upper bound of  $L_\beta(x^{t+1}, \mu^{t+1}) - L_\beta(x^t, \mu^t)$ .

$$\begin{aligned}
& L_\beta(x^{t+1}, \mu^{t+1}) - L_\beta(x^t, \mu^t) \\
&= L_\beta(x^{t+1}, \mu^{t+1}) - L_\beta(x^{t+1}, \mu^t) + L_\beta(x^{t+1}, \mu^t) - L_\beta(x^t, \mu^t) \\
&\leq L_\beta(x^{t+1}, \mu^{t+1}) - L_\beta(x^{t+1}, \mu^t) + L_\beta(x^{t+1}, \mu^t) + \frac{\beta}{2} \|x^{t+1} - x^t\|_{B^T B}^2 - L_\beta(x^t, \mu^t) \\
&\stackrel{a}{\leq} \frac{\|\mu^{t+1} - \mu^t\|}{\beta} + \langle \nabla L_\beta(x^{t+1}, \mu^t) + \beta B^T B(x^{t+1} - x^t), x^{t+1} - x^t \rangle - \frac{\beta}{2} \|x^{t+1} - x^t\|^2 \\
&\stackrel{b}{\leq} -\frac{\beta}{2} \|x^{t+1} - x^t\|^2 + \frac{\|\mu^{t+1} - \mu^t\|^2}{\beta} + \langle \epsilon_t, x^{t+1} - x^t \rangle \\
&\stackrel{c}{\leq} -\frac{\beta}{2} \|x^{t+1} - x^t\|^2 + \frac{3L^2}{\beta\sigma_{\min}} \|x^t - x^{t-1}\|^2 + \frac{3}{\beta} \|\epsilon_{t-1} - \epsilon_t\|^2 \\
&\quad + \frac{3\beta}{\sigma_{\min}} \|B^T B((x^{t+1} - x^t) - (x^t - x^{t-1}))\|^2 + \langle \epsilon_t, x^{t+1} - x^t \rangle,
\end{aligned} \tag{24}$$

520 where the inequality (a) holds from the update rule in (15) and a simple algebra from the expression  
521 of  $L_\beta(x, \mu)$ . Inequality (b) comes from the optimality condition of (14). Particularly, we have

$$g(x^t) + A^T \mu^t + \beta A^T (Ax - b) + \beta B^T B(x - x^t) = 0$$

522 replace  $g(x^t)$  by  $\nabla f(x^t) + \epsilon_t$ , we have the result. The inequality (c) holds using the Lemma 1.

523 □

524 **Lemma 3.** Suppose Assumption 2 is satisfied, then the following condition holds.

$$\begin{aligned}
& \frac{\beta}{2} (\|Ax^{t+1} - b\|^2 + \|x^{t+1} - x^t\|_{B^T B}^2) \\
&\leq \frac{L}{2} \|x^{t+1} - x^t\|^2 + \frac{L}{2} \|x^t - x^{t-1}\|^2 + \frac{\beta}{2} (\|x^t - x^{t-1}\|_{B^T B}^2 + \|Ax^t - b\|^2) \\
&\quad - \frac{\beta}{2} (\|(x^t - x^{t-1}) - (x^{t+1} - x^t)\|_{B^T B}^2 + \|A(x^{t+1} - x^t)\|^2) - \langle \epsilon_t - \epsilon_{t-1}, x^{t+1} - x^t \rangle
\end{aligned} \tag{25}$$

525 *Proof.* Using the optimality condition of  $x^{t+1}$  and  $x^t$  in the update rule in (14), we obtain

$$\langle g(x^t) + A^T \mu^t + \beta A^T (Ax^{t+1} - b) + \beta B^T B(x^{t+1} - x^t), x^{t+1} - x \rangle \leq 0, \forall x \tag{26}$$

526 and

$$\langle g(x^{t-1}) + A^T \mu^{t-1} + \beta A^T (Ax^t - b) + \beta B^T B(x^t - x^{t-1}), x^t - x \rangle \leq 0, \forall x \tag{27}$$

527 Replacing  $g(x^t)$  by  $\nabla f(x^t) + \epsilon_t$  and  $g(x^{t-1})$  by  $\nabla f(x^{t-1}) + \epsilon_{t-1}$ , and using the update rule (15)

$$\langle \nabla f(x^t) + \epsilon_t + A^T \mu^{t+1} + \beta B^T B(x^{t+1} - x^t), x^{t+1} - x \rangle \leq 0, \forall x \tag{28}$$

528

$$\langle \nabla f(x^{t-1}) + \epsilon_{t-1} + A^T \mu^t + \beta B^T B(x^t - x^{t-1}), x^t - x \rangle \leq 0, \forall x \tag{29}$$

529 Now choose  $x = x^t$  in the first inequality and  $x = x^{t+1}$  in the second one, adding two inequalities  
530 together, we obtain

$$\langle \nabla f(x^t) - \nabla f(x^{t-1}) + \epsilon_t - \epsilon_{t-1} + A^T (\mu^{t+1} - \mu^t) + \beta B^T B((x^{t+1} - x^t) - (x^t - x^{t-1})), x^{t+1} - x^t \rangle \leq 0 \tag{30}$$

531 Rearranging above terms, we have

$$\begin{aligned}
& \langle A^T (\mu^{t+1} - \mu^t), x^{t+1} - x^t \rangle \\
&\leq -\langle \nabla f(x^t) - \nabla f(x^{t-1}) + \epsilon_t - \epsilon_{t-1} + \beta B^T B((x^{t+1} - x^t) - (x^t - x^{t-1})), x^{t+1} - x^t \rangle
\end{aligned} \tag{31}$$

532 We first re-express the lhs of above inequality.

$$\begin{aligned}
& \langle A^T(\mu^{t+1} - \mu^t), x^{t+1} - x^t \rangle \\
&= \langle \beta A^T(Ax^{t+1} - b), x^{t+1} - x^t \rangle \\
&= \langle \beta(Ax^{t+1} - b), Ax^{t+1} - b - (Ax^t - b) \rangle \\
&= \beta \|Ax^{t+1} - b\|^2 - \beta \langle Ax^{t+1} - b, Ax^t - b \rangle \\
&= \frac{\beta}{2} (\|Ax^{t+1} - b\|^2 - \|Ax^t - b\|^2 + \|A(x^{t+1} - x^t)\|^2)
\end{aligned} \tag{32}$$

533 Next, we bound the rhs of (31).

$$\begin{aligned}
& - \langle \nabla f(x^t) - \nabla f(x^{t-1}) + \epsilon_t - \epsilon_{t-1} + \beta B^T B((x^{t+1} - x^t) - (x^t - x^{t-1})), x^{t+1} - x^t \rangle \\
&= - \langle \nabla f(x^t) - \nabla f(x^{t-1}) + \epsilon_t - \epsilon_{t-1}, x^{t+1} - x^t \rangle - \beta \langle B^T B((x^{t+1} - x^t) - (x^t - x^{t-1})), x^{t+1} - x^t \rangle \\
&\stackrel{a}{\leq} \frac{L}{2} \|x^{t+1} - x^t\|^2 + \frac{1}{2L} \|\nabla f(x^t) - \nabla f(x^{t-1})\|^2 - \langle \epsilon_t - \epsilon_{t-1}, x^{t+1} - x^t \rangle \\
&\quad - \beta \langle B^T B((x^{t+1} - x^t) - (x^t - x^{t-1})), x^{t+1} - x^t \rangle \\
&\stackrel{b}{\leq} \frac{L}{2} \|x^{t+1} - x^t\|^2 + \frac{L}{2} \|x^t - x^{t-1}\|^2 - \langle \epsilon_t - \epsilon_{t-1}, x^{t+1} - x^t \rangle \\
&\quad - \beta \langle B^T B((x^{t+1} - x^t) - (x^t - x^{t-1})), x^{t+1} - x^t \rangle \\
&= \frac{L}{2} \|x^{t+1} - x^t\|^2 + \frac{L}{2} \|x^t - x^{t-1}\|^2 - \langle \epsilon_t - \epsilon_{t-1}, x^{t+1} - x^t \rangle \\
&\quad + \frac{\beta}{2} (\|x^t - x^{t-1}\|_{B^T B}^2 - \|x^{t+1} - x^t\|_{B^T B}^2 - \|(x^t - x^{t-1}) - (x^{t+1} - x^t)\|_{B^T B}^2),
\end{aligned} \tag{33}$$

534 where the inequality (a) uses Cauchy-Schwartz inequality, (b) holds from the smoothness assumption  
535 on  $f$ .

536 Combine all pieces together, we obtain

$$\begin{aligned}
& \frac{\beta}{2} (\|Ax^{t+1} - b\|^2 + \|x^{t+1} - x^t\|_{B^T B}^2) \\
&\leq \frac{L}{2} \|x^{t+1} - x^t\|^2 + \frac{L}{2} \|x^t - x^{t-1}\|^2 + \frac{\beta}{2} (\|x^t - x^{t-1}\|_{B^T B}^2 + \|Ax^t - b\|^2) \\
&\quad - \frac{\beta}{2} (\|(x^t - x^{t-1}) - (x^{t+1} - x^t)\|_{B^T B}^2 + \|A(x^{t+1} - x^t)\|^2) - \langle \epsilon_t - \epsilon_{t-1}, x^{t+1} - x^t \rangle
\end{aligned} \tag{34}$$

537

□

538 Same with Hong et al. [2017], we define the potential function

$$P_{c,\beta}(x^{t+1}, x^t, \mu^{t+1}) = L_\beta(x^{t+1}, \mu^{t+1}) + \frac{c\beta}{2} (\|Ax^{t+1} - b\|^2 + \|x^{t+1} - x^t\|_{B^T B}^2) \tag{35}$$

539 **Lemma 4.** *If Assumption 2 holds, we have following*

$$\begin{aligned}
& P_{c,\beta}(x^{t+1}, x^t, \mu^{t+1}) \\
&\leq P_{c,\beta}(x^t, x^{t-1}, \mu^t) - \left(\frac{\beta}{2} - \frac{cL}{2} - \frac{2c+1}{2}\right) \|x^{t+1} - x^t\|^2 + \left(\frac{3L^2}{\beta\sigma_{\min}} + \frac{cL}{2}\right) \|x^{t-1} - x^t\|^2 \\
&\quad - \left(\frac{c\beta}{2} - \frac{3\beta\|B^T B\|}{\sigma_{\min}}\right) \|(x^{t+1} - x^t) - (x^t - x^{t-1})\|_{B^T B}^2 + \left(\frac{c}{4} + \frac{\beta}{3}\right) \|\epsilon_{t-1} - \epsilon_t\|^2 + \frac{1}{2} \|\epsilon_t\|^2
\end{aligned} \tag{36}$$

*Proof.*

$$\begin{aligned}
& P_{c,\beta}(x^{t+1}, x^t, \mu^{t+1}) \\
& \leq L_\beta(x^t, \mu^t) + \frac{c\beta}{2}(\|x^t - x^{t-1}\|_{B^T B} + \|Ax^t - b\|^2) - \left(\frac{\beta}{2} - \frac{cL}{2}\right)\|x^{t+1} - x^t\|^2 \\
& + \left(\frac{3L^2}{\beta\sigma_{\min}} + \frac{cL}{2}\right)\|x^{t-1} - x^t\|^2 - \left(\frac{c\beta}{2} - \frac{3\beta\|B^T B\|}{\sigma_{\min}}\right)\|(x^{t+1} - x^t) - (x^t - x^{t-1})\|_{B^T B}^2 \\
& + \frac{3}{\beta}\|\epsilon_t - \epsilon_{t-1}\|^2 + \langle \epsilon_t, x^{t+1} - x^t \rangle - c\langle \epsilon_t - \epsilon_{t-1}, x^{t+1} - x^t \rangle \\
& \leq P_{c,\beta}(x^t, x^{t-1}, \mu^t) - \left(\frac{\beta}{2} - \frac{cL}{2}\right)\|x^{t+1} - x^t\|^2 + \left(\frac{3L^2}{\beta\sigma_{\min}} + \frac{cL}{2}\right)\|x^{t-1} - x^t\|^2 \\
& - \left(\frac{c\beta}{2} - \frac{3\beta\|B^T B\|}{\sigma_{\min}}\right)\|(x^{t+1} - x^t) - (x^t - x^{t-1})\|_{B^T B}^2 + \frac{c}{4}\|\epsilon_{t-1} - \epsilon_t\|^2 \\
& + c\|x^{t+1} - x^t\|^2 + \frac{1}{2}\|\epsilon_t\|^2 + \frac{1}{2}\|x^{t+1} - x^t\|^2 + \frac{\beta}{3}\|\epsilon_t - \epsilon_{t-1}\|^2 \\
& = P_{c,\beta}(x^t, x^{t-1}, \mu^t) - \left(\frac{\beta}{2} - \frac{cL}{2} - \frac{2c+1}{2}\right)\|x^{t+1} - x^t\|^2 + \left(\frac{3L^2}{\beta\sigma_{\min}} + \frac{cL}{2}\right)\|x^{t-1} - x^t\|^2 \\
& - \left(\frac{c\beta}{2} - \frac{3\beta\|B^T B\|}{\sigma_{\min}}\right)\|(x^{t+1} - x^t) - (x^t - x^{t-1})\|_{B^T B}^2 + \left(\frac{c}{4} + \frac{\beta}{3}\right)\|\epsilon_{t-1} - \epsilon_t\|^2 + \frac{1}{2}\|\epsilon_t\|^2
\end{aligned} \tag{37}$$

540 where the second inequality holds from the Cauchy-Schwartz inequality.

541 We require that

$$\frac{c\beta}{2} - \frac{3\beta\|B^T B\|}{\sigma_{\min}} \geq 0,$$

542 which is satisfied when

$$c \geq \frac{6\|B^T B\|}{\sigma_{\min}} \tag{38}$$

We further require

$$\left(\frac{\beta}{2} - \frac{cL}{2} - \frac{2c+1}{2}\right) \geq \left(\frac{3L^2}{\beta\sigma_{\min}} + \frac{cL}{2}\right),$$

543 which will be used later in the telescoping.

544 Thus we require

$$\beta \geq 2cL + 2c + 1 + \frac{6L^2}{\beta\sigma_{\min}}. \tag{39}$$

545 and choose  $\beta \geq CL + \frac{2c+1}{2} + \frac{1}{2}\sqrt{(2cL + 2c + 1)^2 + \frac{24L^2}{\sigma_{\min}}}$  □



546 Now we do summation over both side of (36) and have

$$\begin{aligned}
& \sum_{t=1}^T \left[ \left( \frac{\beta}{2} - \frac{cL}{2} - \frac{2c+1}{2} \right) \|x^{t+1} - x^t\|^2 - \left( \frac{3L^2}{\beta\sigma_{\min}} + \frac{cL}{2} \right) \|x^{t-1} - x^t\|^2 \right] \\
& + \sum_{t=1}^T \left( \frac{c\beta}{2} - \frac{3\beta\|B^T B\|}{\sigma_{\min}} \right) \|(x^{t+1} - x^t) - (x^t - x^{t-1})\|_{B^T B}^2 \\
& \leq P_{c\beta}(x^1, x^0, \mu^0) - P_{c\beta}(x^{T+1}, x^T, \mu^T) + \sum_{t=1}^T \left[ \left( \frac{c}{4} + \frac{\beta}{3} \right) \|\epsilon_{t-1} - \epsilon_t\|^2 + \frac{1}{2} \|\epsilon_t\|^2 \right]
\end{aligned} \tag{40}$$

547 rearrange terms of above inequality.

$$\begin{aligned}
& \sum_{t=1}^{T-1} \left( \frac{\beta}{2} - \frac{cl}{2} - \frac{2c+1}{2} - \frac{3L^2}{\beta\sigma_{\min}} - \frac{cl}{2} \right) \|x^{t+1} - x^t\|^2 + \left( \frac{\beta}{2} - \frac{cl}{2} - \frac{2c+1}{2} \right) \|x^{T+1} - x^T\|^2 \\
& \leq P_{c\beta}(x^1, x^0, \mu^0) - P_{c\beta}(x^{T+1}, x^T, \mu^T) + \left( \frac{3L^2}{\beta\sigma_{\min}} + \frac{cl}{2} \right) \|x^1 - x^0\|^2 + \sum_{t=1}^T \left[ \left( \frac{c}{4} + \frac{\beta}{3} \right) \|\epsilon_{t-1} - \epsilon_t\|^2 + \frac{1}{2} \|\epsilon_t\|^2 \right]
\end{aligned} \tag{41}$$

548 Next we show  $P_{c\beta}$  is lower bounded

549 The following lemma is from Lemma 3.5 in Hong [2016], we present here for completeness.

550 **Lemma 5.** Suppose Assumption 2 are satisfied, and  $(c, \beta)$  are chosen according to (39) and (38).  
551 Then the following state holds true

552  $\exists \underline{P}$  s.t.,  $P_{c\beta}(x^{t+1}, x^t, \mu^{t+1}) \geq \underline{P} > -\infty$

*Proof.*

$$\begin{aligned}
L_{\beta}(x^{t+1}, \mu^{t+1}) &= f(x^{t+1}) + \langle \mu^{t+1}, Ax^{t+1} - b \rangle + \frac{\beta}{2} \|Ax^{t+1} - b\|^2 \\
&= f(x^{t+1}) + \frac{1}{\beta} \langle \mu^{t+1}, \mu^{t+1} - \mu^t \rangle + \frac{\beta}{2} \|Ax^{t+1} - b\|^2 \\
&= f(x^{t+1}) + \frac{1}{2\beta} (\|\mu^{t+1}\|^2 - \|\mu^t\|^2 + \|\mu^{t+1} - \mu^t\|^2) + \frac{\beta}{2} \|Ax^{t+1} - b\|^2.
\end{aligned} \tag{42}$$

553 Sum over both side, we obtain

$$\sum_{t=1}^T L_{\beta}(x^{t+1}, \mu^{t+1}) = \sum_{t=1}^T \left( f(x^{t+1}) + \frac{\beta}{2} \|Ax^{t+1} - b\|^2 + \frac{1}{2\beta} \|\mu^{t+1} - \mu^t\|^2 \right) + \frac{1}{2\beta} (\|\mu^{T+1}\|^2 - \|\mu^1\|^2) \tag{43}$$

554 By assumption 2, above sum is lower bounded, which implies that the sum of the potential function is  
555 also lower bounded (Recall  $P_{c,\beta}(x^{t+1}, x^t, \mu^{t+1}) = L_{\beta}(x^{t+1}, \mu^{t+1}) + \frac{c\beta}{2} (\|Ax^{t+1} - b\|^2 + \|x^{t+1} -$   
556  $x^t\|_{B^T B}^2)$ ). Thus we have

$$P_{c\beta}(x^{t+1}, x^t, \mu^{t+1}) > -\infty, \forall t > 0$$

557 □

558 In the next step, we are ready to provide the convergence rate. Following Hong [2016], we define the  
559 convergence criteria

$$Q(x^{t+1}, \mu^{t+1}) = \|\nabla L_{\beta}(x^{t+1}, \mu^t)\|^2 + \|Ax^{t+1} - b\|^2 \tag{44}$$

560 It is easy to see, when  $Q(x^{t+1}, \mu^t) = 0$ ,  $\nabla f(x) + A^T \mu = 0$  and  $Ax = b$ , which are KKT condition  
 561 of the problem.

$$\begin{aligned} & \|\nabla L_\beta(x^t, \mu^{t-1})\|^2 \\ &= \|\nabla f(x^t) - \nabla f(x^{t-1}) + \epsilon_t - \epsilon_{t-1} + A^T(\mu^{t+1} - \mu^t) + \beta B^T B(x^{t+1} - x^t)\|^2 \\ &\leq 4L^2\|x^t - x^{t-1}\|^2 + 4\|\mu^{t+1} - \mu^t\|^2\|A^T A\| + 4\beta^2\|B^T B(x^{t+1} - x^t)\|^2 + 4\|\epsilon_t - \epsilon_{t-1}\|^2 \end{aligned} \quad (45)$$

562 Using the proof in Lemma 1, we know there exist two positive constants  $c_1$   $c_2$   $c_3$   $c_4$

$$Q(x^t, \mu^{t-1}) \leq c_1\|x^t - x^{t+1}\|^2 + c_2\|x^t - x^{t-1}\|^2 + c_3\|B^T B((x^{t+1} - x^t) - (x^t - x^{t-1}))\|^2 + c_4\|\epsilon_t - \epsilon_{t-1}\|^2.$$

563 Using Lemma 4, we know there must exist a constant  $\kappa$  such that

$$\begin{aligned} & \sum_{t=1}^{T-1} Q(x^t, \mu^{t-1}) \\ &\leq \kappa(P_{c\beta}(x^1, x^0, \mu^0) - P_{c\beta}(x^{T+1}, x^T, \mu^T) + \sum_{t=1}^T [(\frac{c}{4} + \frac{\beta}{3})\|\epsilon_{t-1} - \epsilon_t\|^2 + \frac{1}{2}\|\epsilon_t\|^2]) + c_4 \sum_{t=1}^{T-1} \|\epsilon_t - \epsilon_{t-1}\|^2 \\ &\leq \kappa(P_{c\beta}(x^1, x^0, \mu^0) - \underline{P} + \sum_{t=1}^T [(\frac{c}{4} + \frac{\beta}{3})\|\epsilon_{t-1} - \epsilon_t\|^2 + \frac{1}{2}\|\epsilon_t\|^2]) + c_4 \sum_{t=1}^{T-1} \|\epsilon_t - \epsilon_{t-1}\|^2 \end{aligned} \quad (46)$$

564 Divide both side by  $T$  and take expectation

$$\begin{aligned} \frac{1}{T} \mathbb{E} \sum_{t=1}^T Q(x^t, \mu^{t-1}) &\leq \frac{1}{T} \kappa(P_{c\beta}(x_1, x^0, \mu^0) - \underline{P}) + \frac{\kappa}{T} [\sum_{t=1}^T (\frac{c}{4} + \frac{\beta}{3}) \mathbb{E} \|\epsilon_{t-1} - \epsilon_t\|^2 + \frac{1}{2} \mathbb{E} \|\epsilon_t\|^2] \\ &\quad + \frac{c_4}{T} \sum_{t=1}^{T-1} \mathbb{E} \|\epsilon_t - \epsilon_{t-1}\|^2 \end{aligned} \quad (47)$$

565 Now we bound the R.H.S. of above equation.

566 Recall we choose the mini-batch size  $\sqrt{T}$ ,  $\epsilon_t = \varepsilon_t + \tilde{\varepsilon}_t$  and  $\varepsilon_t \leq c_1/\sqrt{T}$

$$\|\epsilon_{t-1} - \epsilon_t\|^2 \leq 2\mathbb{E}(\|\epsilon_{t-1}\|^2 + \|\epsilon_t\|^2) \leq 4\mathbb{E}(\|\varepsilon_t\|^2 + \|\tilde{\varepsilon}_t\|^2 + \|\varepsilon_{t-1}\|^2 + \|\tilde{\varepsilon}_{t-1}\|^2) \leq \frac{8c_1}{T} + \frac{8\sigma^2}{T} \quad (48)$$

567 Similarly we can bound  $\|\epsilon_t\|^2$ . Combine all pieces together, we obtain

$$\frac{1}{T} \mathbb{E} \sum_{t=1}^T Q(x^t, \mu^{t-1}) \leq \frac{1}{T} \kappa(P_{c\beta}(x_1, x^0, \mu^0) - \underline{P}) + \frac{1}{T} (\kappa c_5 + c_6 \sigma^2),$$

568 where  $c_5, c_6$  are some universal positive constants.

569 Notice  $\min_t \mathbb{E} Q(x^t, \mu^{t-1}) \leq \frac{1}{T} \mathbb{E} \sum_{t=1}^T Q(x^t, \mu^{t-1})$ , we have  $\min_t \mathbb{E} Q(x^t, \mu^{t-1}) \leq (C + \sigma^2)/T$   
 570 where  $C$  is a universal positive constant.

## 571 B.2 Convergence on the dual update

572 If the dual objective function is non-convex, we just follow the exact analysis in our proof on the  
 573 primal problem. Notice the analysis on the dual update is easier than primal one, since we do not

574 have the error term  $\tilde{\epsilon}_t$ . Therefore, we have the algorithm converges to stationary solution with rate  
575  $\mathcal{O}(1/T)$  in criteria  $Q$ .

576 If the dual objective function is linear or convex, the update rule reduce to Extra [Hong, 2016, Shi  
577 et al., 2015] the convergence result of stochastic setting can be adapted from the proof in [Shi et al.,  
578 2015]. Since it is not the main contribution of this paper, we omit the proof here.
